# Supplementary material for: Spectroscopic observation and ultrafast coherent vibrational dynamics of the aqueous phenylalanine radical
Source: Royal Society of Chemistry journal article supplement (doi:10.1039/d1cp04326a), 2022-01-01
Supplement: d1cp04326a1.pdf [file d1cp04326a1.pdf]

## Supplementary Information

### **Spectroscopic Observation and Ultrafast Coherent Vibrational Dynamics of the Aqueous Phenylalanine Radical**

Muhammad Shafiq Bin Mohd Yusof,<sup>1</sup> Jing Xuan Siow,<sup>1</sup> Ningchen Yang,<sup>1</sup> Wei Xin Chan,<sup>1</sup> Zhi-Heng Loh<sup>1,\*</sup>

<sup>1</sup>Division of Chemistry and Biological Chemistry, School of Physical and Mathematical Sciences, Nanyang Technological University, 21 Nanyang Link, Singapore 637371, Singapore

---

\* Corresponding author. E-mail: [zhiheng@ntu.edu.sg](mailto:zhiheng@ntu.edu.sg)

## Section S1: Photon-order Measurements for the Strong-field Photodetachment of the Phenylalaninate Anion in Aqueous Solution

A power-dependence measurement is performed to determine the photon order of the strong-field photodetachment process of the phenylalaninate anion in aqueous solution. For an  $N$ -photon photodetachment process, the differential absorption signal,  $\Delta A$ , scales with intensity of the ionizing pump,  $I$ , as  $\Delta A \propto I^N$ . The photon-order measurements are performed by using a UV probe, which measures the absorption of the radical at a pump-probe time delay of 1 ps and at a probe wavelength of  $\sim 308$  nm, corresponding to the maximum absorption of the Phe• radical. Hence, the absorption signal observed is proportional to the photodetachment yield.

To determine the photon order of the photodetachment process accurately, one must consider that electrons can originate from both the phenylalaninate and hydroxide anions during the photodetachment of the alkaline phenylalaninate solution. To account for the contribution from the photodetachment of hydroxide anions, we record the  $\Delta A$  spectrum against the pump intensity for both the aqueous phenylalaninate and aqueous sodium hydroxide solutions under similar experimental conditions. The difference  $\Delta A$  spectrum, i.e., the  $\Delta\Delta A$  spectrum, is then obtained, which in principle corresponds to solely the  $\Delta A$  signal from the photodetachment of phenylalaninate anion, shown in Fig. 3 of the main text. The  $\Delta\Delta A$  signal is fit to the function

$$\Delta\Delta A = \alpha I^N / [1 + (I/I_{\text{sat}})^N], \quad (1)$$

where  $\alpha$  is the amplitude,  $N$  is the photon order and  $I_{\text{sat}}$  is the saturation intensity. The best fit when  $N = 3$  yields  $\alpha = (9.80 \pm 0.46) \times 10^{-41} \text{ cm}^6 \text{ W}^{-3}$  and  $I_{\text{sat}} = (1.15 \pm 0.02) \times 10^{13} \text{ W cm}^{-2}$ . The value of  $N$  indicates that the photodetachment of phenylalaninate anion in aqueous environment occurs *via* a three-photon resonant enhancement process.

## Section S2: Time-Dependent Density Functional Theory Calculations

We employ time-dependent density functional theory (TD-DFT), as implemented in the GAUSSIAN 16 program, to calculate the electronically excited states and the vertical excitation energies of the isolated phenylalaninate anion and microhydrated phenylalaninate anion  $\text{Phe}(\text{H}_2\text{O})_{10}^-$ . Geometry optimization of the isolated and microhydrated phenylalaninate anion is performed by using B3LYP/6-311G++(d,p). The geometry is then used in the TD-DFT calculations of the excited states. For the isolated phenylalaninate anion, the calculations identify two excited states (labelled #13 and #14) that are located 5.8 eV above the ground state and whose one-photon transition from the ground state bears significant oscillator strength. Information on the molecular orbitals that comprise each electronically excited state, along with their configuration interaction expansion coefficients, are given below. Note that the orbitals labelled 43 and 44 are the HOMO-1 and HOMO of the phenylalaninate anion, shown in Fig. 8 of the main text.

|                   |           |           |           |          |
|-------------------|-----------|-----------|-----------|----------|
| Excited State 13: | Singlet-A | 5.7869 eV | 214.25 nm | f=0.0446 |
| 43 → 47           | 0.13847   |           |           |          |
| 43 → 48           | 0.19898   |           |           |          |
| 43 → 49           | 0.17094   |           |           |          |
| 43 → 50           | 0.13377   |           |           |          |
| 43 → 53           | -0.21341  |           |           |          |
| 43 → 54           | -0.19169  |           |           |          |
| 44 → 49           | 0.13867   |           |           |          |
| 44 → 50           | 0.35004   |           |           |          |
| 44 → 51           | -0.21800  |           |           |          |
| 44 → 53           | 0.21867   |           |           |          |
| 44 → 54           | 0.12298   |           |           |          |

|                   |           |           |           |          |
|-------------------|-----------|-----------|-----------|----------|
| Excited State 14: | Singlet-A | 5.8302 eV | 212.66 nm | f=0.0249 |
| 43 → 47           | 0.28293   |           |           |          |
| 43 → 48           | 0.40151   |           |           |          |
| 43 → 50           | 0.14062   |           |           |          |
| 43 → 53           | -0.10366  |           |           |          |
| 43 → 54           | -0.10163  |           |           |          |
| 44 → 49           | -0.13654  |           |           |          |
| 44 → 50           | -0.14467  |           |           |          |
| 44 → 51           | 0.24322   |           |           |          |
| 44 → 53           | -0.22775  |           |           |          |
| 44 → 54           | -0.13815  |           |           |          |

For the microhydrated phenylalaninate anion  $\text{Phe}(\text{H}_2\text{O})_{10}^-$ , the calculations identified four excited states (labelled #8 to #11) that are located 5.8 eV above the ground state, where excited state #9 and #10 bear the largest oscillator strength. Note that the orbitals labelled 93 and 94 are the HOMO-1 and HOMO of the microhydrated phenylalaninate anion.

|                   |           |           |           |          |
|-------------------|-----------|-----------|-----------|----------|
| Excited State 8:  | Singlet-A | 5.7292 eV | 216.41 nm | f=0.0038 |
| 91 → 95           | -0.10117  |           |           |          |
| 93 → 95           | 0.66478   |           |           |          |
| 93 → 100          | 0.10434   |           |           |          |
| Excited State 9:  | Singlet-A | 5.8024 eV | 213.68 nm | f=0.0199 |
| 94 → 100          | 0.60595   |           |           |          |
| 94 → 101          | 0.23865   |           |           |          |
| 94 → 102          | -0.11948  |           |           |          |
| 94 → 103          | 0.12781   |           |           |          |
| Excited State 10: | Singlet-A | 5.8701 eV | 211.21 nm | f=0.0252 |
| 91 → 95           | -0.12378  |           |           |          |
| 92 → 95           | 0.11160   |           |           |          |
| 92 → 96           | -0.27994  |           |           |          |
| 92 → 97           | -0.16477  |           |           |          |
| 92 → 98           | -0.17985  |           |           |          |
| 93 → 96           | 0.41906   |           |           |          |
| 93 → 97           | -0.15469  |           |           |          |
| 93 → 98           | -0.33356  |           |           |          |
| Excited State 11: | Singlet-A | 5.8905 eV | 210.48 nm | f=0.0095 |
| 91 → 95           | 0.66262   |           |           |          |
| 93 → 96           | 0.10494   |           |           |          |

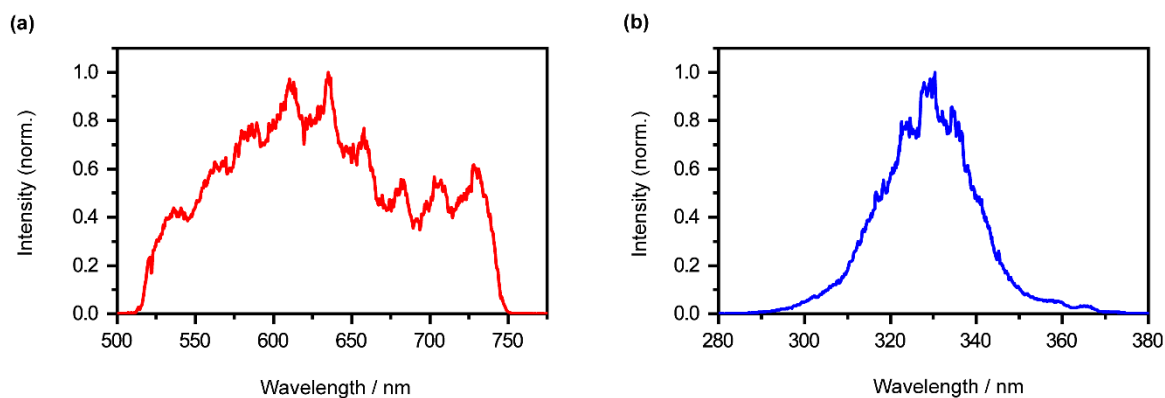

**Fig. S1 (a)** The visible-NIR ionizing pump spectrum ranges from 530 nm to 750 nm, with a center wavelength of 642 nm. **(b)** The broadband UV probe spectrum ranges from 290 nm to 360 nm.

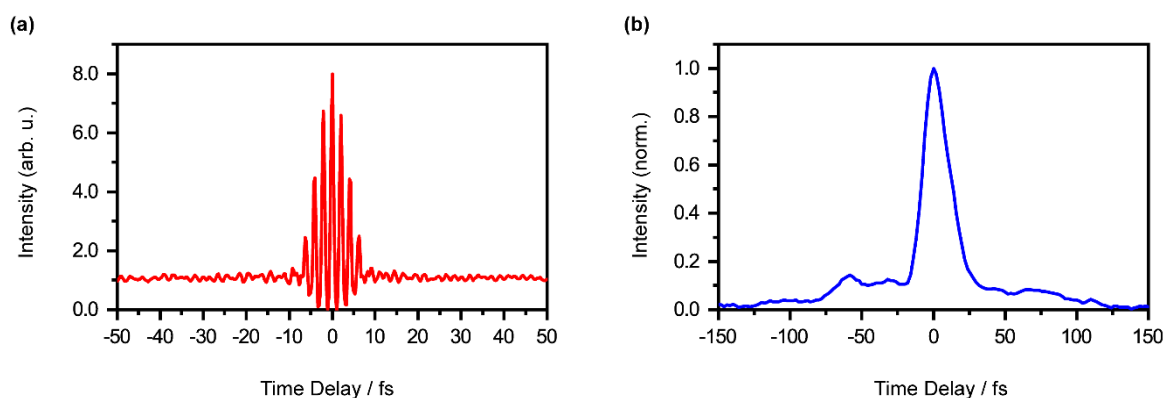

**Fig. S2 (a)** A second-order interferometric auto-correlation trace of the visible-NIR ionizing pump spectrum, measured in a 10- $\mu\text{m}$ -thick,  $\theta = 37.0$  deg Type I BBO crystal, reveals a pulse duration with full-width half-maximum (FWHM) of 5.6 fs. **(b)** The visible-NIR pump – UV probe cross-correlation, measured *via* difference frequency mixing in a 10- $\mu\text{m}$ -thick,  $\theta = 37.0$  deg Type I BBO crystal, reveals a FWHM of 24 fs.

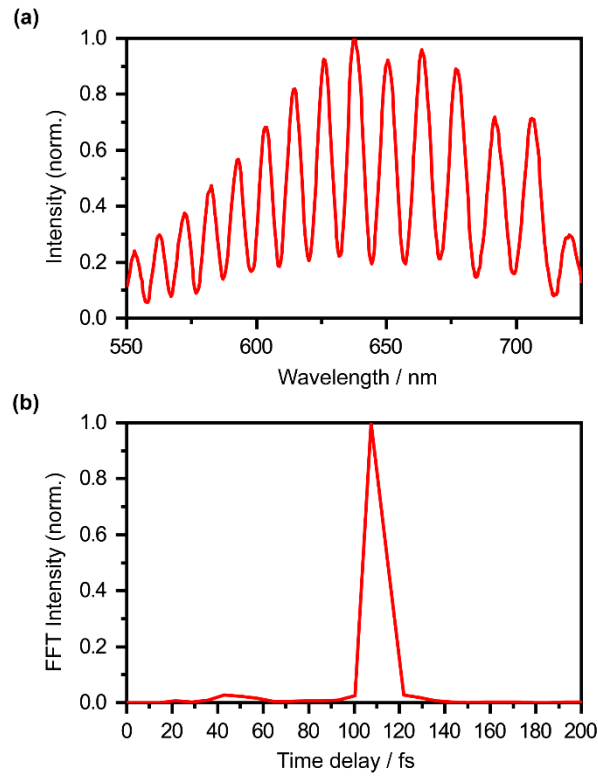

**Fig. S3. (a)** Spectrum of the pump beam reflected from the liquid water microjet target, revealing modulations due to spectral interferometry. **(b)** Normalized FFT spectrum of the spectral modulation, showing a time delay of  $\sim 107$  fs between the front- and back reflections of the liquid microjet. Given the group index of 1.357 at 640-nm wavelength for liquid water, the thickness of the microjet is determined to be  $12 \mu\text{m}$ . From the  $\sim 10$ -fs width of the peak, the uncertainty in the thickness of the liquid microjet is estimated to be  $\sim 1 \mu\text{m}$ .

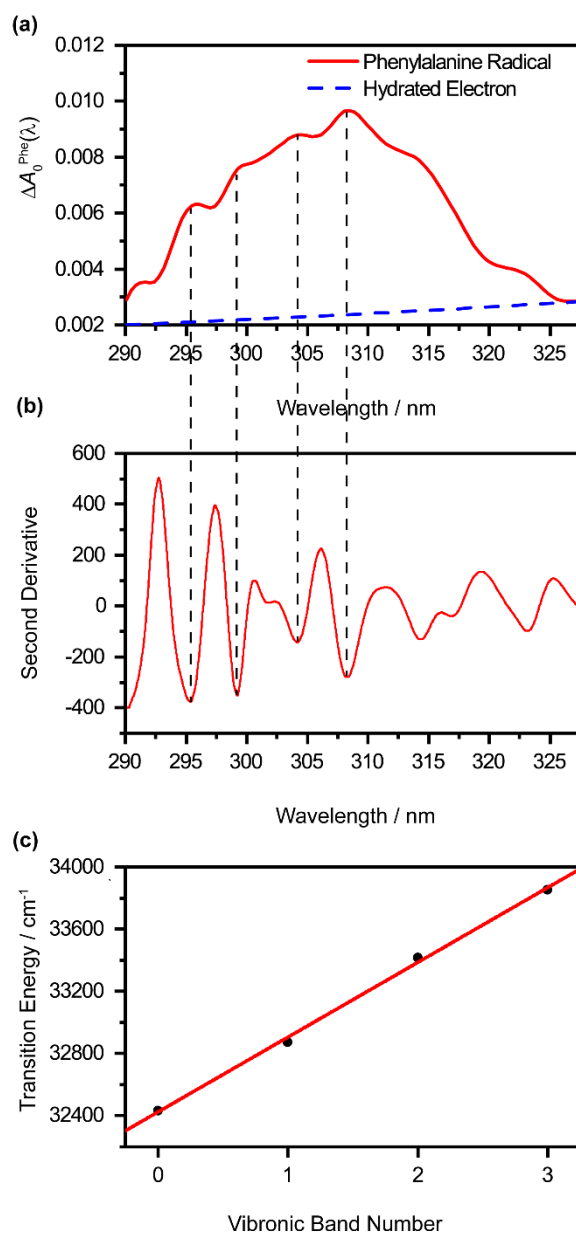

**Fig. S4 (a)** The wavelength-dependent offset values,  $\Delta A_0(\lambda)$ , obtained from the global fitting of photodetached aqueous phenylalaninate anion (in red) after taking the difference between the offset spectra of the aqueous phenylalaninate anion and aqueous sodium hydroxide. The residual vertical offset at long wavelength is most likely due to the absorption of the hydrated electron (in blue, dashed line). **(b)** Second-derivative spectrum of the molar extinction spectrum of the aqueous phenylalanine radical (Fig. 5b of the main text), showing the locations of the main peak and the vibronic bands. **(c)** A linear fit to the transition energies of the vibronic bands reveals a spacing of  $482 \pm 15 \text{ cm}^{-1}$  for the vibronic progression.

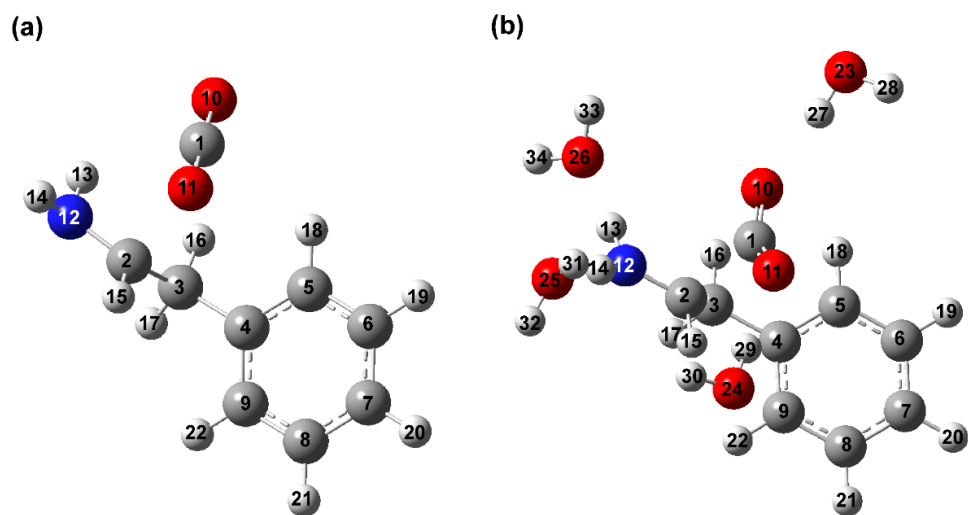

**Fig. S5.** The equilibrium geometry of **(a)** the phenylalanine radical and **(b)** the microhydrated phenylalanine radical,  $\text{Phe}(\text{H}_2\text{O})_4\bullet$ . The microhydrated species includes the carboxyl ( $-\text{CO}_2$ ) and amino ( $-\text{NH}_2$ ) groups of the phenylalanine radical each hydrogen-bonded to two water molecules. The carbon, hydrogen, oxygen and nitrogen atoms are in gray, white, red and blue, respectively.



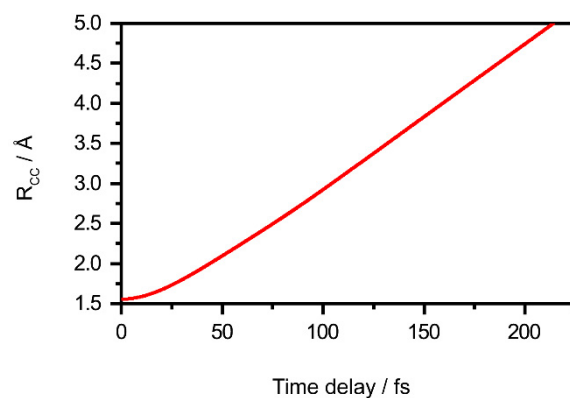

**Fig. S6** Classical trajectory calculations performed using the potential energy curve calculated for the isolated Phe• radical reveal a duration of 214 fs for the C1–C2 bond to extend from the Franck-Condon region (1.557 Å) to 5.00 Å.

**Table S1.** Experimental FFT power, time-domain analysis results, and calculated frequencies of the phenylalanine radical in aqueous solution and their assignments. The calculated frequencies are based on the equilibrium geometry of the microhydrated phenylalanine radical, Phe(H<sub>2</sub>O)<sub>10</sub>•. The numbered assignments denote the benzene ring modes in the Wilson notation<sup>1,2</sup>.

| FFT Freq<br>(cm <sup>-1</sup> ) | Experimental                 |                    |                        |                        | Calc.<br>Freq.<br>(cm <sup>-1</sup> ) | Assignment                                        |
|---------------------------------|------------------------------|--------------------|------------------------|------------------------|---------------------------------------|---------------------------------------------------|
|                                 | Time-Domain Analysis         |                    |                        |                        |                                       |                                                   |
|                                 | Freq.<br>(cm <sup>-1</sup> ) | Amplitude<br>(meV) | Dephasing<br>Time (ps) | Phase<br>( $\pi$ -rad) |                                       |                                                   |
| 486                             | 479 ± 2                      | 0.98 ± 0.15        | 0.64 ± 0.12            | 0.88 ± 0.05            | 515                                   | 16b                                               |
| 750                             | 736 ± 6                      | 3.98 ± 1.12        | 0.17 ± 0.03            | 1.00 ± 0.08            | 759                                   | 11                                                |
| 776                             | 805 ± 6                      | 0.52 ± 0.29        | 0.50 ± 0.28            | 1.18 ± 0.18            | 770                                   | NH <sub>2</sub> wag                               |
| 1003                            | 1004 ± 1                     | 4.23 ± 0.07        | 5.47 ± 0.73            | 1.76 ± 0.01            | 1015                                  | 12                                                |
| 1032                            | 1031 ± 1                     | 1.46 ± 0.08        | 2.83 ± 0.68            | 1.79 ± 0.02            | 1048                                  | 19a                                               |
| 1208                            | 1208 ± 1                     | 2.48 ± 0.13        | 0.98 ± 0.11            | 1.83 ± 0.02            | 1223                                  | Chain CH <sub>2</sub> wag                         |
| 1282                            | 1269 ± 5                     | 0.54 ± 0.18        | 0.71 ± 0.41            | 1.95 ± 0.15            | 1298                                  | 1 (19a, 12, 7a, 20a, 8a, 12, 6a)*                 |
| 1319                            | 1329 ± 5                     | 0.36 ± 0.16        | 0.87 ± 0.71            | 0.28 ± 0.16            | 1351                                  | Chain CH <sub>2</sub> wag / NH <sub>2</sub> twist |
| 1601                            | 1604 ± 2                     | 0.30 ± 0.07        | 2.09 ± 1.41            | 0.69 ± 0.07            | 1640                                  | 9a / NH <sub>2</sub> wag                          |
| 2005                            | 1971 ± 22                    | 1.61 ± 1.22        | 0.13 ± 0.07            | 0.58 ± 0.24            | –                                     | Overtone of 1003 cm <sup>-1</sup>                 |
| 1555                            | 1555 ± 1                     | 0.80 ± 0.05        | 7.37 ± 3.21            | 1.81 ± 0.01            |                                       | Oxygen                                            |
| 2327                            | 2329 ± 1                     | 0.90 ± 0.06        | 15.38 ± 8.04           | 0.96 ± 0.01            |                                       | Nitrogen                                          |

\*Numbers in parentheses refers to minor contributions of phenyl vibrational modes to the main vibrational mode, in descending order of importance.

**Table S2.** Density functional theory (DFT)-calculated vibrational frequencies of the microhydrated 2-phenylethanamine and microhydrated phenylalanine radicals in an aqueous environment. The assignment of atoms and vibrational modes are based on the equilibrium geometries of the microhydrated phenylalanine radical,  $\text{Phe}(\text{H}_2\text{O})_4^\bullet$ , as shown in Fig. S5b. The numbered assignments denote the benzene ring modes in the Wilson notation.<sup>1,2</sup>

| Frequency / $\text{cm}^{-1}$ |                                  |                                                                            |                                                        |
|------------------------------|----------------------------------|----------------------------------------------------------------------------|--------------------------------------------------------|
|                              | Microhydrated 2-phenylethanamine | Microhydrated Phenylalanine Radical [Phe(H <sub>2</sub> O) <sub>4</sub> •] | Assignment                                             |
| 1                            | 59                               | 67                                                                         | CO <sub>2</sub> rock / 2-phenylethanamine rock         |
| 2                            | 124                              | 94                                                                         | CO <sub>2</sub> twist                                  |
| 3                            | 151                              | 167                                                                        | NH <sub>2</sub> twist / CH <sub>2</sub> twist / CH wag |
| 4                            | 220                              | 344                                                                        | CH <sub>2</sub> rock                                   |
| 5                            | 286                              | 319                                                                        | 16b                                                    |
| 6                            | 355                              | 368                                                                        | NH <sub>2</sub> twist / CH <sub>2</sub> rock           |
| 7                            | 339                              | 344                                                                        | CH <sub>2</sub> Rock                                   |
| 8                            | 415                              | 415                                                                        | 16a                                                    |
| 9                            | 503                              | 512                                                                        | 16b                                                    |
| 10                           | 604                              | 610                                                                        | Ring deformation                                       |
| 11                           | 647                              | 651                                                                        | CO <sub>2</sub> bend / NH <sub>2</sub> twist           |
| 12                           | 634                              | 634                                                                        | 6b                                                     |
| 13                           | 757                              | 755                                                                        | NH <sub>2</sub> wag                                    |
| 14                           | 711                              | 712                                                                        | 11                                                     |
| 15                           | 762                              | 761                                                                        | 11                                                     |
| 16                           | 833                              | 837                                                                        | 6a                                                     |
| 17                           | 857                              | 859                                                                        | 10a                                                    |
| 18                           | 924                              | 902                                                                        | 17b                                                    |
| 19                           | 927                              | 939                                                                        | 10b                                                    |
| 20                           | 993                              | 975                                                                        | NH <sub>2</sub> twist / 17b                            |
| 21                           | 987                              | 993                                                                        | 17a                                                    |
| 22                           | 1006                             | 1010                                                                       | 5                                                      |
| 23                           | 1015                             | 1015                                                                       | 12                                                     |

|    |      |      |                                               |
|----|------|------|-----------------------------------------------|
| 24 | 1046 | 1048 | 19a                                           |
| 25 | 1092 | 1105 | 19b                                           |
| 26 | 1151 | 1165 | NH <sub>2</sub> rock / CH <sub>2</sub> twist  |
| 27 | 1173 | 1176 | 8b                                            |
| 28 | 1194 | 1199 | 14, 8b                                        |
| 29 | 1208 | 1234 | NH <sub>2</sub> twist / CH <sub>2</sub> twist |
| 30 | 1218 | 1221 | CH <sub>2</sub> wag                           |
| 31 | 1243 | 1299 | 1 (19a, 12, 7a, 20a, 8a, 12, 6a)*             |
| 32 | 1335 | 1332 | 15                                            |
| 33 | 1345 | 1354 | CH <sub>2</sub> wag / NH <sub>2</sub> twist   |
| 34 | 1355 | 1367 | 3                                             |
| 35 | 1438 | 1458 | CH <sub>2</sub> rock / CH rock                |
| 36 | 1474 | 1467 | CH <sub>2</sub> symmetric bend                |
| 37 | 1478 | 1482 | 18b                                           |
| 38 | 1522 | 1525 | 18a                                           |
| 39 | 1616 | 1619 | 9b                                            |
| 40 | 1636 | 1640 | 9a / NH <sub>2</sub> wag                      |
| 41 | 1669 | 1682 | 9a / NH <sub>2</sub> wag                      |
| 42 | 2908 | 3017 | CH <sub>2</sub> symmetric stretch             |
| 43 | 3002 | 3088 | CH <sub>2</sub> asymmetric stretch            |
| 44 | 3139 | 3139 | CH stretch                                    |
| 45 | 3154 | 3157 | 13                                            |
| 46 | 3156 | 3164 | 7b                                            |
| 47 | 3167 | 3172 | 20a (7a, 2, 13)*                              |
| 48 | 3174 | 3180 | 20b                                           |
| 49 | 3186 | 3189 | 2                                             |
| 50 | 3453 | 3357 | NH <sub>2</sub> symmetric stretch             |
| 51 | 3550 | 3468 | NH <sub>2</sub> asymmetric stretch            |

\*Numbers in parentheses refers to minor contributions of phenyl vibrational modes to the main

vibrational mode, in descending order of importance.

**Table S3.** Density functional theory (DFT)-calculated vibrational frequencies of the isolated phenylalanine radical and the microhydrated phenylalanine radical, with different microhydration configurations, all embedded in a polarizable continuum (PCM). The assignment of atoms and vibrational modes are based on the equilibrium geometries of the phenylalanine radical and the microhydrated phenylalanine radical, as shown in Fig. S5 and Fig. 9b of the main text. The numbered assignments denote the benzene ring modes in the Wilson notation.<sup>1,2</sup>

|    | Calculated Vibrational Frequency (cm <sup>-1</sup> ) |                                      |                                      |                                       |                                       |                                      |                                       |     |     |     | Assignment |                                                        |
|----|------------------------------------------------------|--------------------------------------|--------------------------------------|---------------------------------------|---------------------------------------|--------------------------------------|---------------------------------------|-----|-----|-----|------------|--------------------------------------------------------|
|    | Phe•                                                 | Phe(H <sub>2</sub> O) <sub>3</sub> • | Phe(H <sub>2</sub> O) <sub>4</sub> • | Phe(H <sub>2</sub> O) <sub>6a</sub> • | Phe(H <sub>2</sub> O) <sub>6b</sub> • | Phe(H <sub>2</sub> O) <sub>9</sub> • | Phe(H <sub>2</sub> O) <sub>10</sub> • |     |     |     |            |                                                        |
| 1  | 8                                                    | 7                                    | 23                                   | 15                                    | 22                                    | 22                                   | 18                                    | 18  | 18  | 18  | 18         | CO <sub>2</sub> twist / Phenylalanine twist            |
| 2  | 15                                                   | 44                                   | 24                                   | 53                                    | 42                                    | 47                                   | 63                                    | 63  | 63  | 63  | 63         | CO <sub>2</sub> twist / Benzene twist                  |
| 3  | 22                                                   | 49                                   | 67                                   | 25                                    | 15                                    | 57                                   | 15                                    | 15  | 15  | 15  | 15         | CO <sub>2</sub> rock / 2-phenylethylamine rock         |
| 4  | 31                                                   | 24                                   | 32                                   | 36                                    | 31                                    | 32                                   | 28                                    | 28  | 28  | 28  | 28         | Benzene twist                                          |
| 5  | 46                                                   | 99                                   | 44                                   | 101                                   | 58                                    | 53                                   | 53                                    | 53  | 53  | 53  | 53         | CO <sub>2</sub> rock / 2-phenylethylamine rock         |
| 6  | 62                                                   | 54                                   | 94                                   | 287                                   | 107                                   | 81                                   | 49                                    | 49  | 49  | 49  | 49         | CO <sub>2</sub> twist                                  |
| 7  | 100                                                  | 105                                  | 173                                  | 175                                   | 166                                   | 103                                  | 178                                   | 178 | 178 | 178 | 178        | Benzene rock                                           |
| 8  | 111                                                  | 94                                   | 167                                  | 67                                    | 105                                   | 171                                  | 103                                   | 103 | 103 | 103 | 103        | NH <sub>2</sub> twist / CH <sub>2</sub> twist / CH wag |
| 9  | 281                                                  | 158                                  | 319                                  | 315                                   | 314                                   | 299                                  | 323                                   | 323 | 323 | 323 | 323        | 16b                                                    |
| 10 | 326                                                  | 263                                  | 139                                  | 187                                   | 158                                   | 205                                  | 652                                   | 652 | 652 | 652 | 652        | NH <sub>2</sub> rock                                   |
| 11 | 339                                                  | 329                                  | 344                                  | 344                                   | 343                                   | 343                                  | 345                                   | 345 | 345 | 345 | 345        | CH <sub>2</sub> rock                                   |

|    |      |      |      |      |      |      |      |                                                   |
|----|------|------|------|------|------|------|------|---------------------------------------------------|
| 12 | 351  | 466  | 368  | 710  | 440  | 699  | 595  | NH <sub>2</sub> twist / CH <sub>2</sub> rock      |
| 13 | 415  | 415  | 415  | 415  | 415  | 415  | 414  | 16a                                               |
| 14 | 505  | 505  | 512  | 513  | 511  | 515  | 515  | 16b                                               |
| 15 | 594  | 612  | 444  | 438  | 453  | 598  | 624  | Ring deformation                                  |
| 16 | 617  | 296  | 610  | 610  | 575  | 598  | 611  | Ring deformation                                  |
| 17 | 634  | 634  | 634  | 634  | 580  | 621  | 634  | 6b                                                |
| 18 | 637  | 636  | 651  | 647  | 658  | 658  | 691  | CO <sub>2</sub> bend / NH <sub>2</sub> twist      |
| 19 | 658  | 653  | 668  | 674  | 670  | 684  | 682  | CO <sub>2</sub> scissor                           |
| 20 | 687  | 507  | 755  | 781  | 727  | 784  | 770  | NH <sub>2</sub> wag                               |
| 21 | 712  | 712  | 712  | 713  | 635  | 712  | 712  | 11                                                |
| 22 | 762  | 758  | 761  | 761  | 670  | 760  | 759  | 11                                                |
| 23 | 833  | 834  | 837  | 838  | 837  | 836  | 836  | 6a                                                |
| 24 | 857  | 858  | 859  | 859  | 859  | 858  | 858  | 10a                                               |
| 25 | 922  | 889  | 902  | 903  | 899  | 905  | 904  | 17b                                               |
| 26 | 929  | 931  | 939  | 940  | 936  | 940  | 940  | 10b                                               |
| 27 | 974  | 954  | 975  | 982  | 969  | 972  | 968  | NH <sub>2</sub> twist / Chain CC stretch /<br>17b |
| 28 | 988  | 992  | 993  | 992  | 992  | 992  | 992  | 17a                                               |
| 29 | 1005 | 1009 | 1010 | 1009 | 1009 | 1010 | 1010 | 5                                                 |
| 30 | 1015 | 1015 | 1015 | 1015 | 1015 | 1015 | 1015 | 12                                                |
| 31 | 1047 | 1048 | 1048 | 1048 | 1048 | 1048 | 1048 | 19a                                               |

|    |      |      |      |      |      |      |      |                                               |
|----|------|------|------|------|------|------|------|-----------------------------------------------|
| 32 | 1092 | 1097 | 1105 | 1107 | 1100 | 1115 | 1113 | 19b                                           |
| 33 | 1147 | 1147 | 1165 | 1078 | 1156 | 1158 | 1155 | NH <sub>2</sub> rock / CH <sub>2</sub> twist  |
| 34 | 1174 | 1176 | 1176 | 1177 | 1176 | 1177 | 1176 | 8b                                            |
| 35 | 1195 | 1200 | 1199 | 1199 | 1198 | 1200 | 1199 | 14, 8b                                        |
| 36 | 1203 | 1224 | 1234 | 1236 | 1230 | 1230 | 1231 | NH <sub>2</sub> twist / CH <sub>2</sub> twist |
| 37 | 1216 | 1221 | 1221 | 1221 | 1222 | 1221 | 1223 | CH <sub>2</sub> wag                           |
| 38 | 1230 | 1294 | 1299 | 1299 | 1298 | 1299 | 1298 | 1 (19a, 12, 7a, 20a, 8a, 12, 6a)*             |
| 39 | 1334 | 1330 | 1332 | 1332 | 1331 | 1330 | 1330 | 15                                            |
| 40 | 1343 | 1351 | 1354 | 1354 | 1352 | 1350 | 1351 | CH <sub>2</sub> wag / NH <sub>2</sub> twist   |
| 41 | 1356 | 1365 | 1367 | 1367 | 1365 | 1365 | 1366 | 3                                             |
| 42 | 1371 | 1254 | 1267 | 1273 | 1261 | 1278 | 1276 | CO <sub>2</sub> symmetric stretch             |
| 43 | 1432 | 1457 | 1458 | 1456 | 1458 | 1447 | 1448 | CH <sub>2</sub> rock / CH rock                |
| 44 | 1473 | 1464 | 1467 | 1468 | 1466 | 1467 | 1468 | CH <sub>2</sub> symmetric bend                |
| 45 | 1478 | 1483 | 1482 | 1482 | 1483 | 1482 | 1482 | 18b                                           |
| 46 | 1523 | 1525 | 1525 | 1525 | 1525 | 1525 | 1525 | 18a                                           |
| 47 | 1617 | 1620 | 1619 | 1619 | 1620 | 1620 | 1620 | 9b                                            |
| 48 | 1637 | 1640 | 1640 | 1640 | 1640 | 1640 | 1640 | 9a / NH <sub>2</sub> wag                      |
| 49 | 1638 | 1650 | 1682 | 1698 | 1701 | 1715 | 1712 | 9a / NH <sub>2</sub> wag                      |
| 50 | 2381 | 1960 | 1897 | 1884 | 1920 | 1847 | 1850 | CO <sub>2</sub> asymmetric stretch            |
| 51 | 2920 | 3007 | 3017 | 3020 | 3013 | 3026 | 3026 | CH <sub>2</sub> symmetric stretch             |

|    |      |      |      |      |      |      |      |                                    |
|----|------|------|------|------|------|------|------|------------------------------------|
| 52 | 3000 | 3072 | 3088 | 3089 | 3080 | 3089 | 3090 | CH <sub>2</sub> asymmetric stretch |
| 53 | 3154 | 3160 | 3139 | 3134 | 3147 | 3136 | 3137 | CH stretch                         |
| 54 | 3155 | 3158 | 3157 | 3157 | 3157 | 3157 | 3157 | 13                                 |
| 55 | 3157 | 3164 | 3164 | 3164 | 3164 | 3164 | 3164 | 7b                                 |
| 56 | 3167 | 3172 | 3172 | 3172 | 3172 | 3172 | 3173 | 20a (7a, 2, 13)*                   |
| 57 | 3175 | 3180 | 3180 | 3179 | 3179 | 3180 | 3180 | 20b                                |
| 58 | 3187 | 3190 | 3189 | 3189 | 3190 | 3190 | 3190 | 2                                  |
| 59 | 3523 | 3556 | 3357 | 3280 | 3408 | 3260 | 3267 | NH <sub>2</sub> symmetric stretch  |
| 60 | 3622 | 3668 | 3468 | 3380 | 3516 | 3404 | 3449 | NH <sub>2</sub> symmetric stretch  |

\*Numbers in parentheses refers to minor contributions of phenyl vibrational modes to the main vibrational mode, in descending order of importance



## References

1. E. B. Wilson, *Phys. Rev.*, 1934, **45**, 706-714.
2. A. M. Gardner and T. G. Wright, *J. Chem. Phys.*, 2011, **135**, 114305.
